# Supplementary material for: Evolution of Seventh Cholera Pandemic and Origin of 1991 Epidemic, Latin America
Source: PubMed Central journal article supplement (PMC3321917; doi:10.3201/eid1607.100131), 2010-07
Supplement: 10-0131-Techapp.pdf [file 10-0131-Techapp.pdf]

# Evolution of Seventh Cholera Pandemic and Origin of 1991 Epidemic, Latin America

## Technical Appendix

### Methods

#### Primers and Location of Single Nucleotide Polymorphisms studied

The detection of each single nucleotide polymorphism (SNP) required 2 forward primers. The first forward primer contained the SNP of the seventh pandemic at the 3' end, while the second primer contained the SNP of either MO10 O139 Bengal or M66-2 pre-seventh pandemic. A complementary tail was added to the 5' end of each forward primer to form a hairpin structure. Alterations to the original primer sequence were also made to facilitate the folding of the primer into a hairpin structure. Table A-1 and Table A-2 contain the name, location, forward and reverse primer for each SNP. The same reverse primer was used for each pair of SNP reactions.

#### Hairpin Real-Time PCR (HP RT-PCR)

All RT-PCRs were carried out in a Rotor-Gene 6000 instrument (Corbett Life Science, Mortlake, New South Wales, Australia) with a 72-well rotor disk. Each RT-PCR reaction consisted of  $\approx 100$  ng DNA, 2.5  $\mu\text{mol}$  each of forward and reverse primers and 5  $\mu\text{L}$  SensiMix*Plus* SYBR Green (Quantace, Alexandria, New South Wales, Australia) (includes 2 $\times$  Mix containing reaction buffer), Heat-Activated Taq DNA polymerase, dNTPs 6 mM MgCl<sub>2</sub>, SYBR Green I. MilliQ water was added to adjust the final volume to 10  $\mu\text{L}$ . The thermal cycling conditions were set up as follows: stage 1, 95°C for 10 min to activate Taq polymerase, stage 2, 95°C for 15 s, 69°C for 30 s, repeated 10  $\times$  followed by stage 3, 95°C for 15 s, 60°C for 30 s, repeated 40  $\times$ . On completion of each run, data were collected and analyzed with Rotor-Gene operating software v1.7.87 (Corbett Life Science). The fluorescent signal for each reaction was measured at the end of each cycle and plotted on a fluorescence curve. The cycle threshold (Ct) was set across the amplification curves during the exponential fluorescence phase.

Table A-1: Name, location and primers of 7th cholera pandemic and pre-7th pandemic single-nucleotide polymorphisms\*

| Locus            | Gene        | Annotation                                                             | Location in N16961 | 7th Pandemic                                                                |     | M66-2                                                                       |     | Reverse primer (5'→3')  |
|------------------|-------------|------------------------------------------------------------------------|--------------------|-----------------------------------------------------------------------------|-----|-----------------------------------------------------------------------------|-----|-------------------------|
|                  |             |                                                                        |                    | Forward primer (5'→3')                                                      | SNP | Forward primer (5'→3')                                                      | SNP |                         |
| Large chromosome |             |                                                                        |                    |                                                                             |     |                                                                             |     |                         |
| vc0329           | <i>rpoC</i> | DNA-directed RNA polymerase, beta subunit                              | 393808             | atctttacc <b><u>T</u></b> GTCCTGCAGCAGGTAAAGA <b><u>I</u></b>               | T   | gtctttacc <b><u>T</u></b> GTCCTGCAGCAGGTAAAGA <b><u>C</u></b>               | C   | GAAGTATTGAGCTGGCATGTC   |
| vc0672           | <i>ptsP</i> | Phosphoenolpyruvate-protein phosphotransferase                         | 765286             | ttctctac <b><u>C</u></b> GCCTTGGCAGTAGAGAA <b><u>A</u></b>                  | A   | ctctctac <b><u>C</u></b> GCCTTGGCAGTAGAGAG <b><u>G</u></b>                  | G   | TCCCCATCGAGCTTTTTTA     |
| vc0835           | <i>tcpT</i> | Toxin co-regulated pilus biosynthesis protein T                        | 943582             | caaacattAGCCGA <b><u>C</u></b> GCCTAATGTTTT <b><u>G</u></b>                 | G   | aaacattAGCCGA <b><u>C</u></b> GCCTAATGTTTT <b><u>I</u></b>                  | T   | TGAGGTAGTTTTTCGGTTCCACG |
| vc0837           | <i>tcpF</i> | Toxin co-regulated pilus biosynthesis protein F                        | 946533             | ccactag <b><u>G</u></b> AACCATATCAGCCTAGTG <b><u>G</u></b>                  | G   | tcactag <b><u>G</u></b> AACCATATCAGCCTAGTG <b><u>A</u></b>                  | A   | GTATTTGACCACTTGTAAACCAT |
| vc0987           | <i>hemH</i> | Ferrochelatase                                                         | 1099038            | ttgcagc <b><u>G</u></b> AGGAAGAGTGGCTGCA <b><u>A</u></b>                    | A   | ctgcagc <b><u>G</u></b> AGGAAGAGTGGCTGCA <b><u>G</u></b>                    | G   | TTTTAATGCCTTGGCGAG      |
| vc1088           |             | Sensor histidine kinase                                                | 1202761            | agacaa <b><u>A</u></b> GCACTCGGGTGCCTTGTC <b><u>I</u></b>                   | T   | ggacaa <b><u>A</u></b> GCACTCGGGTGCCTTGTC <b><u>C</u></b>                   | C   | GCCTACAGCAGCATCAAAAAAT  |
| vc1091           | <i>oppA</i> | Oligopeptide ABC transporter, periplasmic oligopeptide-binding protein | 1206798            | agcggta <b><u>T</u></b> TCCGGAAATCACCGC <b><u>I</u></b>                     | T   | tgccgta <b><u>T</u></b> TCCGGAAATCACCGC <b><u>A</u></b>                     | A   | CTTCGCTTCTGCAATACGCTCT  |
| vc1248           |             | Methyl-accepting chemotaxis protein                                    | 1435093            | aacgctc <b><u>A</u></b> ACCTATCATAACGAGCGT <b><u>I</u></b>                  | T   | gacgctc <b><u>A</u></b> ACCTATCATAACGAGCGT <b><u>C</u></b>                  | C   | GGCTCAGGCATGTTGTTGG     |
| vc1579           |             | Enterobactin synthetase component F-related protein                    | 1770713            | atcaccatc <b><u>T</u></b> GCCGTTAATTGATGGTG <b><u>A</u></b>                 | T   | gtcaccatc <b><u>T</u></b> GCCGTTAATTGATGGTG <b><u>A</u></b>                 | C   | TGCTTGTATATGTTGTGCCT    |
| vc1898           |             | Methyl-accepting chemotaxis protein                                    | 2128112            | aatgat <b><u>C</u></b> AGTTTTGCGCTGATCAT <b><u>I</u></b>                    | T   | gatgat <b><u>C</u></b> AGTTTTGCGCTGATCAT <b><u>C</u></b>                    | C   | AATGCAGCGGTTGAAACACT    |
| vc1967           |             | Methyl-accepting chemotaxis protein                                    | 2201875            | tgtttctt <b><u>G</u></b> CATCAACAATCAAGAA <b><u>A</u></b> C <b><u>A</u></b> | A   | cgtttctt <b><u>G</u></b> CATCAACAATCAAGAA <b><u>A</u></b> C <b><u>G</u></b> | G   | ACTTGCCTTGCCTTATCGTAGG  |
| vc2046           |             | Conserved hypothetical protein                                         | 2287749            | aagcttt <b><u>G</u></b> TGGCCAGTGCAAAGCT <b><u>I</u></b>                    | T   | gagcttt <b><u>G</u></b> TGGCCAGTGCAAAGCT <b><u>C</u></b>                    | C   | AACCTTGAGTATCCTGTGG     |
| vc2080           |             | Transcriptional regulator, AraC/XylS family                            | 2322891            | agctctt <b><u>A</u></b> TCTCCATCCGAGTTAAGAGC <b><u>I</u></b>                | T   | cgctctt <b><u>A</u></b> TCTCCATCCGAGTTAAGAGC <b><u>G</u></b>                | G   | GCATTATCTAACGACGGA      |
| vc2091           | <i>sdhC</i> | Succinate dehydrogenase, cytochrome b556 subunit                       | 2336169            | actctc <b><u>T</u></b> GACAGGTGAGGAGAG <b><u>I</u></b>                      | T   | tctctc <b><u>T</u></b> GACAGGTGAGGAGAG <b><u>A</u></b>                      | A   | CAGCAATCGCATCCATCCT     |
| vc2674           | <i>hslU</i> | Protease HslVU, ATPase subunit HslU                                    | 2927259            | tgccct <b><u>T</u></b> AACCTTGATGAAAGGC <b><u>A</u></b>                     | A   | cgccct <b><u>T</u></b> AACCTTGATGAAAGGC <b><u>G</u></b>                     | G   | TGTTGAAGTGACCCCGAA      |
| Small chromosome |             |                                                                        |                    |                                                                             |     |                                                                             |     |                         |
| vca0247          |             | Transcriptional regulator, DeoR family                                 | 302905             | actttgc <b><u>G</u></b> ATACAATCGAGCGCAAAG <b><u>I</u></b>                  | T   | gctttgc <b><u>G</u></b> ATACAATCGAGCGCAAAG <b><u>C</u></b>                  | C   | TCGGTTAGCCCTTTGCCAGA    |
| vca0946          | <i>malK</i> | Maltose/maltodextrin ABC transporter, ATP-binding protein              | 830773             | gccgcta <b><u>G</u></b> AACCGTCCAA <b><u>T</u></b> AGCGG <b><u>C</u></b>    | C   | accgcta <b><u>G</u></b> AACCGTCCAA <b><u>T</u></b> AGCGG <b><u>I</u></b>    | T   | GTCGTACAAAATTGAGGTGCGGG |
| vca1073          |             | Bifunctional protein putA                                              | 956775             | agtggtg <b><u>C</u></b> GATGCAGATGTGGCACACT <b><u>I</u></b>                 | T   | ggtggtg <b><u>C</u></b> GATGCAGATGTGGCACACC <b><u>C</u></b>                 | C   | ACTGCGTGTGCTGTTTGT      |

\*SNP, single nucleotide polymorphism. Nucleotides in lower case indicate a complementary tail which was added to the primer to form a hairpin structure. Bold and italic nucleotides indicate that a deliberate change has been made to the sequence to facilitate the folding of the primer into a hairpin structure. Bold and underlined nucleotides indicate the corresponding SNP of either the 7th pandemic or M-662.

Table A-2: Name, location and primers of the *Vibrio cholerae* O139 MO10 single-nucleotide polymorphisms\*

| Locus  | Gene        | Annotation                                                                                                | Location in N16961 | 7th pandemic                        |     | MO10                                |     | Reverse primer (5'→3') |
|--------|-------------|-----------------------------------------------------------------------------------------------------------|--------------------|-------------------------------------|-----|-------------------------------------|-----|------------------------|
|        |             |                                                                                                           |                    | Forward primer (5'→3')              | SNP | Forward primer (5'→3')              | SNP |                        |
| vc0008 |             | Amino acid ABC transporter ATP binding protein                                                            | 5414               | cgataacc <b>CGGTATGTTTTGGGTATCG</b> | G   | tgataacc <b>CGGTATGTTTTGGGTATCA</b> | A   | GCGTGAACCTTTCTTGAGC    |
| vc0847 |             | Phage family integrase                                                                                    | 913179             | caacagc <b>CTTGCCGTTTGGCTGTTG</b>   | G   | taacagc <b>CTTGCCGTTTGGCTGTTA</b>   | A   | GCCATCGTGATTTTATTT     |
| vc0959 |             | Haemolysin (putative)                                                                                     | 1024406            | gccgaaAG <b>TTCTTGGCGATCTTTCGGC</b> | C   | accgaaAG <b>TTCTTGGCGATCTTTCGGT</b> | T   | GGTCCGAGTAGAAAGTCC     |
| vc1082 |             | Hypothetical protein                                                                                      | 1149897            | ggcctt <b>CTTCTGGTTGAGAAGGCC</b>    | C   | agcctt <b>CTTCTGGTTGAGAAGGCT</b>    | T   | AGATGGGCAAATACCTTA     |
| vc1318 | <i>ompV</i> | outer membrane protein OmpV                                                                               | 1401874            | tggtcaa <b>CAATATCGCCTGTGTTGCCA</b> | A   | aggcaa <b>CAATATCGCCTGTGTTGCCT</b>  | T   | TACCAGCAAGGGCACAATCA   |
| vc1707 |             | Hypothetical protein                                                                                      | 1838824            | cgtttga <b>ACTGTCACATTCCAAACG</b>   | G   | tgtttga <b>ACTGTCACATTCCAAACA</b>   | A   | AAACTTCGATAGCGTGAT     |
| vc1865 |             | Hypothetical protein                                                                                      | 2005889            | accagc <b>AATTTAACTTGGCGCTGGT</b>   | T   | cccagc <b>AATTTAACTTGGCGCTGGG</b>   | G   | CCCACCCCAAGGCAAGC      |
| vc1877 | <i>1pxk</i> | Tetra-acyldisaccharide 4'-kinase                                                                          | 2021732            | gtcgtg <b>GATGTTACCCACCACGAC</b>    | C   | ttcgtg <b>GATGTTACCCACCACGAA</b>    | A   | TATCAAACGGGCGACAAA     |
| vc2077 |             | Ferrous iron transport protein B                                                                          | 2234253            | gcacac <b>CTCTGCATCAGGTGTG</b>      | C   | acacac <b>CTCTGCATCAGGTGTGT</b>     | T   | AAAGAAGCGGTTGTGGGG     |
| vc2362 |             | Threonine Synthetase                                                                                      | 2518900            | tttttc <b>GATTGTGCCGAAAAAG</b>      | A   | cttttc <b>GATTGTGCCGAAAAAG</b>      | G   | GGTCAAGCCGTTCCGCAA     |
| vc2562 | <i>cpdB</i> | Bi-functional 2' 3'- cyclic nucleotide 2'-phosphodiesterase/3' nucleotidase periplasmic precursor protein | 2744542            | gtgtacctt <b>GCGATCATCAAGGTACAC</b> | C   | atgtacctt <b>GCGATCATCAAGGTACAT</b> | T   | ACATCACGTCGTTGCTT      |
| vc2599 |             | Ribonuclease R                                                                                            | 2766113            | gtgaag <b>GCTTGCTACGGCCTTCAC</b>    | C   | atgaag <b>GCTTGCTACGGCCTTCAT</b>    | T   | CACCAACGAAATCAGAGT     |

\*SNP, single nucleotide polymorphism. Nucleotides in lower case indicate a complementary tail which was added to the primer to form a hairpin structure.

Bold and italic nucleotides indicate that a deliberate change has been made to the sequence to facilitate the folding of the primer into a hairpin structure. Bold and underlined nucleotides indicate the corresponding SNP of either the 7th pandemic or MO10.

Table A-3: Single-nucleotide polymorphism (SNP) profiles of 71 isolates of pandemic *Vibrio cholerae*

| Group   | SNP profile | Isolate | Year | Location  | N16961 SNPs |          |          |          |          |          |          |          |          |          |          |          |          |          |          |          |          | MO10 SNPs |          |        |        |        |        |        |        |        |        |        |        |        |   |
|---------|-------------|---------|------|-----------|-------------|----------|----------|----------|----------|----------|----------|----------|----------|----------|----------|----------|----------|----------|----------|----------|----------|-----------|----------|--------|--------|--------|--------|--------|--------|--------|--------|--------|--------|--------|---|
|         |             |         |      |           | vc0672      | vc0835   | vc0837   | vc0987   | vc1088   | vc1091   | vc1248   | vca0946  | vc2046   | vc2080   | vc2091   | vc2674   | vc1967   | vca0247  | vca1073  | vc0329   | vc1579   | vc1898    | vc2363   | vc2562 | vc1877 | vc0959 | vc1082 | vc1865 | vc2077 | vc1318 | vc0008 | vc0847 | vc1707 | vc2599 |   |
| Pre-7th | 1           | M66-2†  | 1937 | Indonesia | T           | A        | G        | C        | A        | C        | C        | T        | G        | C        | G        | G        | A        | C        | C        | C        | C        | G         | A        | C      | C      | C      | C      | T      | C      | A      | G      | G      | G      | C      |   |
|         |             | M543    | 1938 | Iraq      | T           | A        | G        | C        | A        | C        | C        | T        | G        | C        | G        | G        | A        | C        | C        | C        | C        | G         | A        | C      | C      | C      | C      | T      | C      | A      | G      | G      | G      | C      |   |
| I       | 2           | M640    | 1954 | Egypt     | T           | A        | G        | C        | A        | C        | C        | T        | G        | C        | G        | G        | A        | C        | C        | C        | C        | A         | A        | C      | C      | C      | C      | T      | C      | A      | G      | G      | G      | C      |   |
|         |             | M793    | 1961 | Indonesia | <b>G</b>    | <b>G</b> | <b>A</b> | <b>T</b> | <b>T</b> | <b>T</b> | <b>T</b> | <b>T</b> | <b>C</b> | <b>A</b> | <b>T</b> | <b>T</b> | <b>A</b> | <b>A</b> | <b>C</b> | <b>C</b> | <b>C</b> | <b>C</b>  | <b>G</b> | A      | C      | C      | C      | C      | T      | C      | A      | G      | G      | G      | C |
|         | 4           | M686    | 1968 | Thailand  | <b>G</b>    | <b>G</b> | <b>A</b> | <b>T</b> | <b>T</b> | <b>T</b> | <b>T</b> | <b>T</b> | <b>C</b> | <b>A</b> | <b>T</b> | <b>T</b> | <b>A</b> | <b>T</b> | <b>C</b> | <b>C</b> | <b>C</b> | <b>C</b>  | <b>G</b> | A      | C      | C      | C      | C      | T      | C      | A      | G      | G      | G      | C |
|         |             | M799    | 1989 | Hong Kong | <b>G</b>    | <b>G</b> | <b>A</b> | <b>T</b> | <b>T</b> | <b>T</b> | <b>T</b> | <b>T</b> | <b>C</b> | <b>A</b> | <b>T</b> | <b>T</b> | <b>A</b> | <b>T</b> | <b>C</b> | <b>C</b> | <b>C</b> | <b>C</b>  | <b>G</b> | A      | C      | C      | C      | C      | T      | C      | A      | G      | G      | G      | C |
|         |             | M803    | 1961 | Hong Kong | <b>G</b>    | <b>G</b> | <b>A</b> | <b>T</b> | <b>T</b> | <b>T</b> | <b>T</b> | <b>T</b> | <b>C</b> | <b>A</b> | <b>T</b> | <b>T</b> | <b>A</b> | <b>T</b> | <b>C</b> | <b>C</b> | <b>C</b> | <b>C</b>  | <b>G</b> | A      | C      | C      | C      | C      | T      | C      | A      | G      | G      | G      | C |
|         |             | M804    | 1962 | India     | <b>G</b>    | <b>G</b> | <b>A</b> | <b>T</b> | <b>T</b> | <b>T</b> | <b>T</b> | <b>T</b> | <b>C</b> | <b>A</b> | <b>T</b> | <b>T</b> | <b>A</b> | <b>T</b> | <b>C</b> | <b>C</b> | <b>C</b> | <b>C</b>  | <b>G</b> | A      | C      | C      | C      | C      | T      | C      | A      | G      | G      | G      | C |
|         |             | M805    | 1963 | Cambodia  | <b>G</b>    | <b>G</b> | <b>A</b> | <b>T</b> | <b>T</b> | <b>T</b> | <b>T</b> | <b>T</b> | <b>C</b> | <b>A</b> | <b>T</b> | <b>T</b> | <b>A</b> | <b>T</b> | <b>C</b> | <b>C</b> | <b>C</b> | <b>C</b>  | <b>G</b> | A      | C      | C      | C      | C      | T      | C      | A      | G      | G      | G      | C |
|         |             | M806    | 1964 | India     | <b>G</b>    | <b>G</b> | <b>A</b> | <b>T</b> | <b>T</b> | <b>T</b> | <b>T</b> | <b>T</b> | <b>C</b> | <b>A</b> | <b>T</b> | <b>T</b> | <b>A</b> | <b>T</b> | <b>C</b> | <b>C</b> | <b>C</b> | <b>C</b>  | <b>G</b> | A      | C      | C      | C      | C      | T      | C      | A      | G      | G      | G      | C |
|         |             | M807    | 1966 | Vietnam   | <b>G</b>    | <b>G</b> | <b>A</b> | <b>T</b> | <b>T</b> | <b>T</b> | <b>T</b> | <b>T</b> | <b>C</b> | <b>A</b> | <b>T</b> | <b>T</b> | <b>A</b> | <b>T</b> | <b>C</b> | <b>C</b> | <b>C</b> | <b>C</b>  | <b>G</b> | A      | C      | C      | C      | C      | T      | C      | A      | G      | G      | G      | C |
|         |             | M808    | 1969 | Vietnam   | <b>G</b>    | <b>G</b> | <b>A</b> | <b>T</b> | <b>T</b> | <b>T</b> | <b>T</b> | <b>T</b> | <b>C</b> | <b>A</b> | <b>T</b> | <b>T</b> | <b>A</b> | <b>T</b> | <b>C</b> | <b>C</b> | <b>C</b> | <b>C</b>  | <b>G</b> | A      | C      | C      | C      | C      | T      | C      | A      | G      | G      | G      | C |

|      |      |                 |      |               |          |   |   |   |   |   |   |   |   |   |   |   |   |   |   |   |   |   |   |   |   |   |   |   |   |   |   |   |   |   |
|------|------|-----------------|------|---------------|----------|---|---|---|---|---|---|---|---|---|---|---|---|---|---|---|---|---|---|---|---|---|---|---|---|---|---|---|---|---|
| II   | 5    | M811            | 1971 | Burma         | G        | G | A | T | T | T | T | C | A | T | T | A | T | C | C | C | C | G | A | C | C | C | C | T | C | A | G | G | G | C |
|      |      | M815            | 1973 | Philippines   | G        | G | A | T | T | T | T | C | A | T | T | A | T | C | C | C | C | G | A | C | C | C | C | T | C | A | G | G | G | C |
|      |      | M820            | 1978 | Malaysia      | G        | G | A | T | T | T | T | C | A | T | T | A | T | C | C | C | C | G | A | C | C | C | C | T | C | A | G | G | G | C |
|      |      | M662            | 1993 | Indonesia     | G        | G | A | T | T | T | T | C | A | T | T | A | T | C | C | C | C | G | A | C | C | C | C | T | C | A | G | G | G | C |
|      |      | M663            | 1992 | Indonesia     | G        | G | A | T | T | T | T | C | A | T | T | A | T | C | C | C | C | G | A | C | C | C | C | T | C | A | G | G | G | C |
|      |      | M809            | 1970 | Sierra Leone  | G        | G | A | T | T | T | T | C | A | T | T | A | T | T | T | C | C | G | A | C | C | C | C | T | C | A | G | G | G | C |
|      |      | M821            | 1982 | France        | G        | G | A | T | T | T | T | C | A | T | T | A | T | T | T | C | C | G | A | C | C | C | C | T | C | A | G | G | G | C |
|      |      | M823            | 1984 | Algeria       | G        | G | A | T | T | T | T | C | A | T | T | A | T | T | T | C | C | G | A | C | C | C | C | T | C | A | G | G | G | C |
|      |      | M826            | 1990 | Malawi        | G        | G | A | T | T | T | T | C | A | T | T | A | T | T | T | C | C | G | A | C | C | C | C | T | C | A | G | G | G | C |
|      |      | M2314           | 1991 | Peru          | G        | G | A | T | T | T | T | C | A | T | T | A | T | T | T | C | C | G | A | C | C | C | C | T | C | A | G | G | G | C |
|      |      | M2315           | 1999 | Brazil        | G        | G | A | T | T | T | T | C | A | T | T | A | T | T | T | C | C | G | A | C | C | C | C | T | C | A | G | G | G | C |
|      |      | M2316           | 1998 | Peru          | G        | G | A | T | T | T | T | C | A | T | T | A | T | T | T | C | C | G | A | C | C | C | C | T | C | A | G | G | G | C |
|      |      | M829            | 1992 | Malawi        | G        | G | A | T | T | T | T | C | A | T | T | A | T | T | T | C | C | G | A | C | C | C | C | T | C | A | G | G | G | C |
|      |      | M830            | 1993 | French Guiana | G        | G | A | T | T | T | T | C | A | T | T | A | T | T | T | C | C | G | A | C | C | C | C | T | C | A | G | G | G | C |
|      |      | M812            | 1971 | Chad          | G        | G | A | T | T | T | T | C | A | T | T | A | T | T | T | C | C | G | A | C | C | C | C | T | C | A | G | G | G | C |
|      |      | M817            | 1974 | Chad          | G        | G | A | T | T | T | T | C | A | T | T | A | T | T | T | C | C | G | A | C | C | C | C | T | C | A | G | G | G | C |
|      |      | M810            | 1970 | Ethiopia      | G        | G | A | T | T | T | T | C | A | T | T | A | T | T | T | C | C | G | A | C | C | C | C | T | C | A | G | G | G | C |
|      |      | M813            | 1972 | Senegal       | G        | G | A | T | T | T | T | C | A | T | T | A | T | T | T | C | C | G | A | C | C | C | C | T | C | A | G | G | G | C |
|      |      | M814            | 1972 | Morocco       | G        | G | A | T | T | T | T | C | A | T | T | A | T | T | T | C | C | G | A | C | C | C | C | T | C | A | G | G | G | C |
|      |      | M816            | 1974 | Senegal       | G        | G | A | T | T | T | T | C | A | T | T | A | T | T | T | C | C | G | A | C | C | C | C | T | C | A | G | G | G | C |
| M819 | 1975 | Germany         | G    | G             | A        | T | T | T | T | C | A | T | T | A | T | T | T | C | C | G | A | C | C | C | C | T | C | A | G | G | G | C |   |   |
| M818 | 1975 | Comoros Islands | G    | G             | A        | T | T | T | T | C | A | T | T | A | T | T | T | C | C | G | A | C | C | C | C | T | C | A | G | G | G | C |   |   |
| III  | 6    | M650            | 1976 | India         | G        | G | A | T | T | T | T | C | A | T | T | A | T | T | T | T | A | A | C | C | C | C | T | C | A | G | G | G | C |   |
|      |      | M647            | 1970 | Bangladesh    | G        | G | A | T | T | T | T | C | A | T | T | A | T | T | T | T | T | A | A | C | C | C | C | T | C | A | G | G | G | C |
|      |      | M795            | 1976 | Bangladesh    | G        | G | A | T | T | T | T | C | A | T | T | A | T | T | T | T | T | A | A | C | C | C | C | T | C | A | G | G | G | C |
|      |      | M797            | 1986 | Hong Kong     | G        | G | A | T | T | T | T | C | A | T | T | A | T | T | T | T | T | A | A | C | C | C | C | T | C | A | G | G | G | C |
|      |      | N16961†         | 1971 | Bangladesh    | G        | G | A | T | T | T | T | C | A | T | T | A | T | T | T | T | T | A | A | C | C | C | C | T | C | A | G | G | G | C |
|      |      | RC9†            | 1985 | Kenya         | G        | G | A | T | T | T | T | C | A | T | T | A | T | T | T | T | T | A | A | C | C | C | C | T | C | A | G | G | G | C |
|      |      | M825            | 1988 | Zaire         | G        | G | A | T | T | T | T | C | A | T | T | A | T | T | T | T | T | A | A | C | C | C | C | T | C | A | G | G | G | C |
| IV   | 7    | M646            | 1979 | Bangladesh    | G        | G | A | T | T | T | T | C | A | T | T | A | T | T | T | T | A | G | T | A | T | T | T | C | A | G | G | G | C |   |
|      |      | M652            | 1981 | India         | G        | G | A | T | T | T | T | C | A | T | T | A | T | T | T | T | T | A | G | T | A | T | T | T | C | A | G | G | G | C |
|      |      | M714            | 1979 | Bangladesh    | G        | G | A | T | T | T | T | C | A | T | T | A | T | T | T | T | T | A | G | T | A | T | T | T | C | A | G | G | G | C |
|      |      | M723            | 1982 | Thailand      | G        | G | A | T | T | T | T | C | A | T | T | A | T | T | T | T | T | A | G | T | A | T | T | T | C | A | G | G | G | C |
|      |      | M740            | 1985 | Thailand      | G        | G | A | T | T | T | T | C | A | T | T | A | T | T | T | T | T | A | G | T | A | T | T | T | C | A | G | G | G | C |
|      |      | M764            | 1989 | Thailand      | G        | G | A | T | T | T | T | C | A | T | T | A | T | T | T | T | T | A | G | T | A | T | T | T | C | A | G | G | G | C |
|      |      | M822            | 1983 | Vietnam       | G        | G | A | T | T | T | T | C | A | T | T | A | T | T | T | T | T | A | G | T | A | T | T | T | C | A | G | G | G | C |
| V    | 8    | M654            | 1991 | India         | G        | G | A | T | T | T | T | C | A | T | T | A | T | T | T | T | A | G | T | A | T | T | G | T | T | G | G | G | C |   |
|      |      | 9               | M791 | 1991          | Thailand | G | G | A | T | T | T | T | C | A | T | T | A | T | T | T | T | T | A | G | T | A | T | T | G | T | T | A | G | G |

|           |           |          |      |            |   |   |   |   |   |   |   |   |   |   |   |   |   |   |   |   |   |   |   |   |   |   |   |   |   |   |   |   |   |   |
|-----------|-----------|----------|------|------------|---|---|---|---|---|---|---|---|---|---|---|---|---|---|---|---|---|---|---|---|---|---|---|---|---|---|---|---|---|---|
|           |           | M824     | 1987 | Algeria    | G | G | A | T | T | T | T | C | A | T | T | A | T | T | T | T | T | A | G | T | A | T | T | G | T | T | A | G | G | C |
|           |           | MJ1236†  | 1994 | Bangladesh | G | G | A | T | T | T | T | C | A | T | T | A | T | T | T | T | T | A | G | T | A | T | T | G | T | T | A | G | G | C |
|           |           | CIRS101† | 2002 | Bangladesh | G | G | A | T | T | T | T | C | A | T | T | A | T | T | T | T | T | A | G | T | A | T | T | G | T | T | A | G | G | C |
|           |           | B33†     | 2004 | Mozambique | G | G | A | T | T | T | T | C | A | T | T | A | T | T | T | T | T | A | G | T | A | T | T | G | T | T | A | G | G | C |
|           |           | M827     | 1990 | Guinea     | G | G | A | T | T | T | T | C | A | T | T | A | T | T | T | T | T | A | G | T | A | T | T | G | T | T | A | G | G | C |
|           |           | M828     | 1991 | Morocco    | G | G | A | T | T | T | T | C | A | T | T | A | T | T | T | T | T | A | G | T | A | T | T | G | T | T | A | G | G | C |
| <b>VI</b> | <b>10</b> | M834     | 1993 | Bangladesh | G | G | A | T | T | T | T | C | A | T | T | A | T | T | T | T | T | A | G | T | A | T | T | G | T | T | A | A | A | T |
|           |           | M833     | 1993 | Bangladesh | G | G | A | T | T | T | T | C | A | T | T | A | T | T | T | T | T | A | G | T | A | T | T | G | T | T | A | A | A | T |
|           |           | M985     | 1992 | India      | G | G | A | T | T | T | T | C | A | T | T | A | T | T | T | T | T | A | G | T | A | T | T | G | T | T | A | A | A | T |
|           |           | M987     | 1992 | India      | G | G | A | T | T | T | T | C | A | T | T | A | T | T | T | T | T | A | G | T | A | T | T | G | T | T | A | A | A | T |
|           |           | M989     | 1993 | India      | G | G | A | T | T | T | T | C | A | T | T | A | T | T | T | T | T | A | G | T | A | T | T | G | T | T | A | A | A | T |
|           |           | M988     | 1993 | Bangladesh | G | G | A | T | T | T | T | C | A | T | T | A | T | T | T | T | T | A | G | T | A | T | T | G | T | T | A | A | A | T |
|           |           | M986     | 1992 | India      | G | G | A | T | T | T | T | C | A | T | T | A | T | T | T | T | T | A | G | T | A | T | T | G | T | T | A | A | A | T |
|           |           | M984     | 1992 | India      | G | G | A | T | T | T | T | C | A | T | T | A | T | T | T | T | T | A | G | T | A | T | T | G | T | T | A | A | A | T |
|           |           | M835     | 1993 | Bangladesh | G | G | A | T | T | T | T | C | A | T | T | A | T | T | T | T | T | A | G | T | A | T | T | G | T | T | A | A | A | T |
|           |           | M537     | 1993 | India      | G | G | A | T | T | T | T | C | A | T | T | A | T | T | T | T | T | A | G | T | A | T | T | G | T | T | A | A | A | T |
|           |           | M540     | 1993 | India      | G | G | A | T | T | T | T | C | A | T | T | A | T | T | T | T | T | A | G | T | A | T | T | G | T | T | A | A | A | T |
|           |           | M542     | 1993 | Bangladesh | G | G | A | T | T | T | T | C | A | T | T | A | T | T | T | T | T | A | G | T | A | T | T | G | T | T | A | A | A | T |
|           |           | M545     | 1993 | India      | G | G | A | T | T | T | T | C | A | T | T | A | T | T | T | T | T | A | G | T | A | T | T | G | T | T | A | A | A | T |
|           |           | M831     | 1993 | Bangladesh | G | G | A | T | T | T | T | C | A | T | T | A | T | T | T | T | T | A | G | T | A | T | T | G | T | T | A | A | A | T |
|           |           | MO10†    | 1992 | India      | G | G | A | T | T | T | T | C | A | T | T | A | T | T | T | T | T | A | G | T | A | T | T | G | T | T | A | A | A | T |

§ SNPs were selected from comparison between N16961 with M66-2 ,and N16961 with MO10. SNP mutations are shaded in blue, ancestral SNPs have been left unshaded. The SNPs are grouped in the order in which the mutations are inferred to have occurred. Horizontal lines separate individual SNP profiles

† SNP data for these isolates was obtained from GenBank.(accession nos: RC9- ACHX00000000, MJ-1236- CP001385/CP001486, B33- ACHZ00000000, CIRS 101- ACVA00000000, MO10- AAKF00000000, N16961- AE003852, M66-2- CP001233)
